# Supplementary material
Source: PubMed Central journal article supplement (PMC3825460)

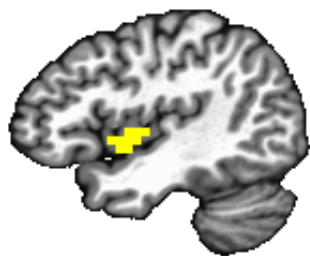

$x=-41$

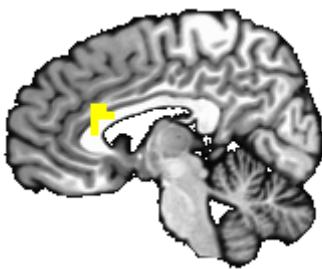

$x=5$

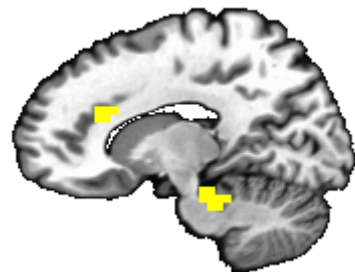

$x=13$

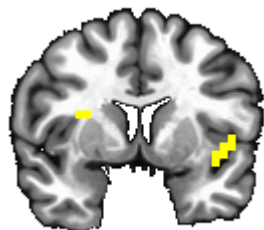

$y=-20$

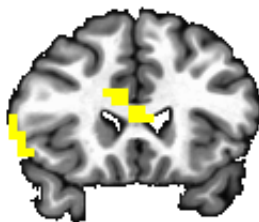

$y=-3$

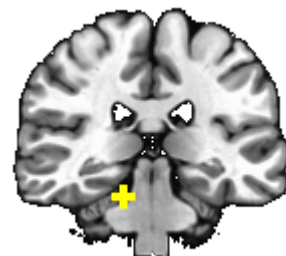

$y=28$

R L

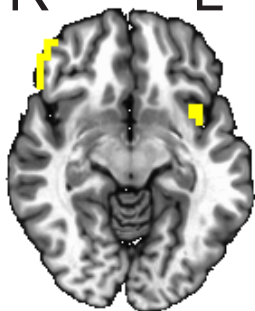

$z=-7$

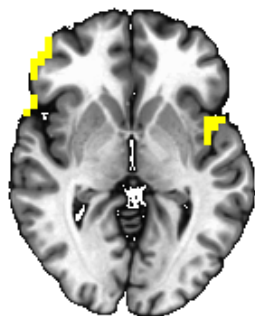

$z=0$

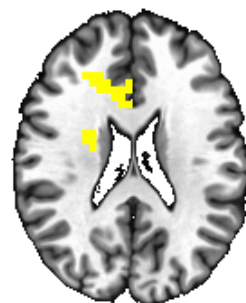

$z=21$

Supplement: NIHMS510914-supplement-01.pdf [file NIHMS510914-supplement-01.pdf]
